# Supplementary material for: “Spectromics”: Holistic Optical Assessment of Human Cartilage via Complementary Vibrational Spectroscopy for Osteoarthritis Diagnosis
Source: bioRxiv or medRxiv preprint supplement (doi:10.1101/2023.12.21.23300367), 2023-12-24
Supplement: Supplementary file [file media-1.pdf]

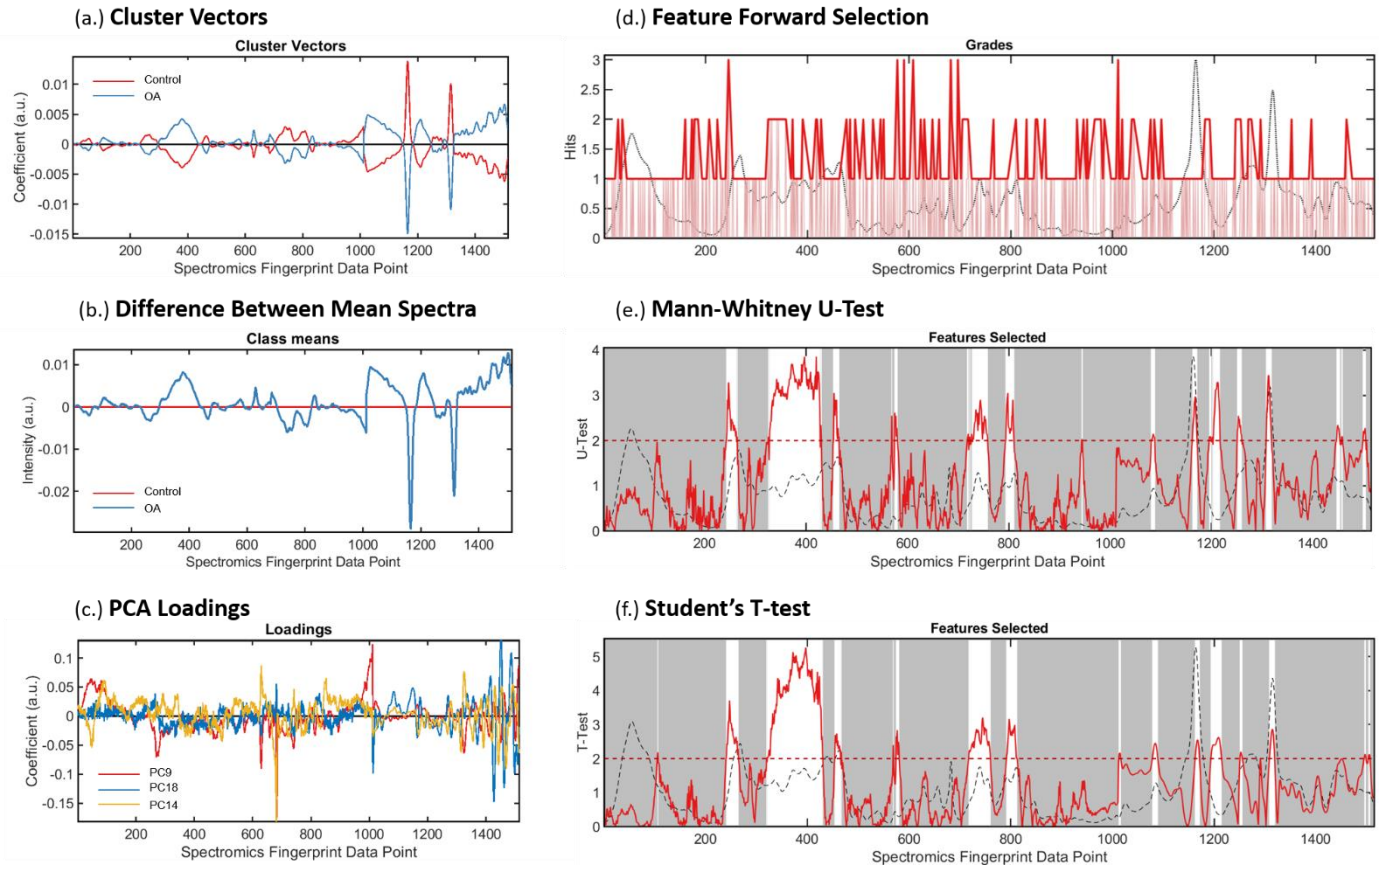

**Supplementary Figure 1:** Feature selection to identify spectral biomarkers for articular cartilage diagnostics. Results were corroborated between each independent statistical analysis to highlight wavenumbers most contributing to tissue classification. (a.) Cluster Vector Analysis for class clustering, (b.) Difference Between Mean Control and OA Spectra, (c.) PCA-LDA loadings scores, (d.) Feature Forward Selection, (e.) Mann-Whitney U-Test, (f.) Student's T-Test
