# Supplementary material for: “Spectromics”: Holistic Optical Assessment of Human Cartilage via Complementary Vibrational Spectroscopy for Osteoarthritis Diagnosis
Source: bioRxiv or medRxiv preprint supplement (doi:10.1101/2023.12.21.23300367), 2023-12-24
Supplement: Supplementary file [file media-2.pdf]

**Supplementary Table 1:** Spectral Biomarkers identified by corroboration of independent statistical tests to identify osteoarthritis vs control class discriminating peaks. Features in agreement under 3 and 4 tests (no. of hits) are displayed alongside the corresponding spectral position and attributed chemical vibration. <sup>18,19 18,28 53</sup>

| Hits | Spectromics Data Point | Wavenumber (cm <sup>-1</sup> ) | Modality         | 1 <sup>st</sup> Derivative Attributed Peak | 2 <sup>nd</sup> Derivative Attributed Peak | Assignment                                                                                                |
|------|------------------------|--------------------------------|------------------|--------------------------------------------|--------------------------------------------|-----------------------------------------------------------------------------------------------------------|
| 4*   | 373 – 381              | 1342.64 – 1334.18              | Raman            | -                                          | -                                          | <b>CH, GAGs</b><br>at 1342 cm <sup>-1</sup>                                                               |
| 4*   | 733 – 738              | 946.56 – 940.82                | Raman            | -                                          | -                                          | <b>C–C deformation of aggrecan / C–O–C stretching of GAGs</b><br>at 937 – 941 cm <sup>-1</sup>            |
| 4*   | 806 – 808              | 862.16 – 859.83                | Raman            | -                                          | -                                          | <b>C–C Stretching, Proline, Collagen</b><br>at 856 – 859 cm <sup>-1</sup>                                 |
| 4*   | 1011 / 1015            | 617.056 / 10819.9              | Raman / NIR-SWIR | -                                          | -                                          | <b>Spectromics Artefact:</b><br>Raman to NIR-SWIR transition                                              |
| 4*   | 1164, 1168             | 7158.55, 7094.38               | NIR-SWIR         | 7174.78                                    | 7062.73                                    | <b>O–H Stretching (1st Overtone)</b><br>at 7280 - 6040, 7460 - 6780 cm <sup>-1</sup>                      |
| 4*   | 1207 – 1211            | 6524.79 – 6471.57              | NIR-SWIR         | -                                          | 6254.84                                    | <b>N–H stretch (-CONH, 1<sup>st</sup> overtone)</b><br>at 6352 cm <sup>-1</sup>                           |
| 4*   | 1313 – 1316            | 5356.95 – 5333.09              | NIR-SWIR         | 5342.02                                    | 5280.17                                    | <b>Bound &amp; Free water</b><br>at 5200 cm <sup>-1</sup>                                                 |
| 4*   | 1443 – 1449            | 4402.48 – 4366.62              | NIR-SWIR         | 4408.17, 4420.64                           | 4372.55, 4384.47                           | <b>C–H bend (protein, 2<sup>nd</sup> overtone),</b><br>at 4350 cm <sup>-1</sup>                           |
| 4*   | 1500 – 1503            | 4084.29 – 4068.83              | NIR-SWIR         | 4073.97, 4058.60                           | 4068.83, 4073.97                           | <b>No precedent</b>                                                                                       |
| 3*   | 106, 107               | 1616.69, 1615.69               | Raman            | -                                          | -                                          | <b>Amide I</b><br>at 1612–1696 cm <sup>-1</sup>                                                           |
| 3*   | 245 – 247              | 1475.99 – 1473.94              | Raman            | -                                          | -                                          | <b>CH<sub>2</sub> deformation/scissoring; protein &amp; lipids</b><br>at 1441 – 1460 cm <sup>-1</sup>     |
| 3*   | 264 – 269              | 1456.43 – 1451.27              | Raman            | -                                          | -                                          | <b>CH<sub>2</sub>/CH<sub>3</sub> scissoring; collagen &amp; other protein</b><br>at 1451 cm <sup>-1</sup> |
| 3*   | 455 – 463              | 1255.22 – 1246.61              | Raman            | -                                          | -                                          | <b>C–N stretching (Amide III)</b><br>at 1230 – 1280 cm <sup>-1</sup>                                      |
| 3*   | 575 – 577              | 1124.38 – 1122.17              | Raman            | -                                          | -                                          | <b>Pyranose ring</b><br>at 1127 – 1163 cm <sup>-1</sup>                                                   |
| 3*   | 629, 630               | 1064.33, 1063.21               | Raman            | -                                          | -                                          | <b>SO<sub>3</sub><sup>-</sup> stretching in sulphated GAGs, PGs</b><br>at 1060 – 1064 cm <sup>-1</sup>    |
| 3*   | 1083, 1084             | 8767.51, 8744.18               | NIR-SWIR         | 8719.98                                    | 8577.59                                    | <b>C–H stretching (2<sup>nd</sup> overtone)</b><br>at 8820 – 8060, 8695 - 8197 cm <sup>-1</sup>           |
